# Supplementary material for: Design, Synthesis, and Biological Evaluation of Phenol Bioisosteric Analogues of 3-Hydroxymorphinan
Source: PubMed Central journal article supplement (PMC6381151; doi:10.1038/s41598-019-38911-1), 2019-02-19
Supplement: 41598_2019_38911_MOESM1_ESM.pdf [file 41598_2019_38911_MOESM1_ESM.pdf]

---

# Design, Synthesis, and Biological Evaluation of Phenol Bioisosteric Analogues of 3-Hydroxymorphinan

Ziqiang Li<sup>1,+</sup>, Xiuqi Bao<sup>3,+</sup>, Xiaoguang Bai<sup>2</sup>, Guoning Zhang<sup>2</sup>, Juxian Wang<sup>2</sup>, Mei Zhu<sup>2</sup>, Yue Wang<sup>3</sup>, Junmei Shang<sup>3</sup>, Chanjuan Sheng<sup>3</sup>, Dan Zhang<sup>3,\*</sup> & Yucheng Wang<sup>2,\*</sup>

<sup>1</sup>School of Pharmacy, Jinzhou Medical University, Jinzhou, Liaoning 121001, China.

<sup>2</sup>Institute of Medicinal Biotechnology, Chinese Academy of Medical Science & Peking Union Medical College, Beijing 100050, China.

<sup>3</sup>State Key Laboratory of Bioactive Substrate and Function of Natural Medicine, Institute of Materia Medica, Chinese Academy of Medical Science & Peking Union Medical College, Beijing 100050, China.

<sup>+</sup>These authors contributed equally to this work. Correspondence and requests for materials should be addressed to Y.W. (email: [wangyucheng@imb.pumc.edu.cn](mailto:wangyucheng@imb.pumc.edu.cn)) or D.Z. (email: [danzhang@imm.ac.cn](mailto:danzhang@imm.ac.cn))

# MS and NMR spectra of synthesized imidazolone-morphinan and intermediates

JEOL AccuTOF CS (JMS T100CS)

National Research Center for Analysis of Drugs and Metabolites

Acq. Data Name: HM-140526  
Internal Sample Id:  
Ionization Mode: ESI+  
MS Calibration Name: TFANA\_ESI+-1000  
Reduction History: Subtract[Correct Base(5.0%);Average(MS[1] 0.3090..0.4000);D:\TESTDATA\TEST2013\20140529-BK8.1.0;Average(MS[1] 0.2810..0.3170)-1.0\*Average(MS[...  
Experiment Date/Time: 5/29/2014 2:02:14 PM  
Orifice1 Volt Sweep: 60V  
Acquired m/z Range: 50.0..1000.0  
Spec. Record Interval: 1.0[s]  
Ring Lens Volt: 20[V]  
Time of Maximum: 0.510[min]  
Operator Name: MS

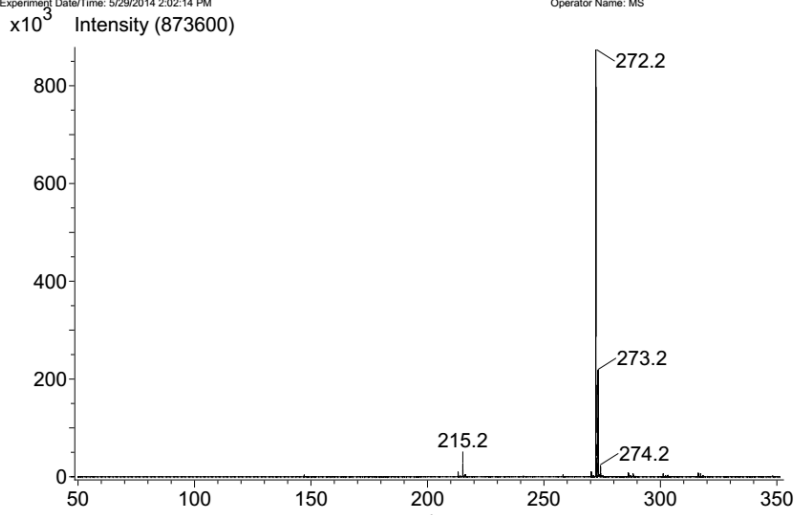

BRUKER AV-III-500 1H-NMR HM-140526 IN CDCL3

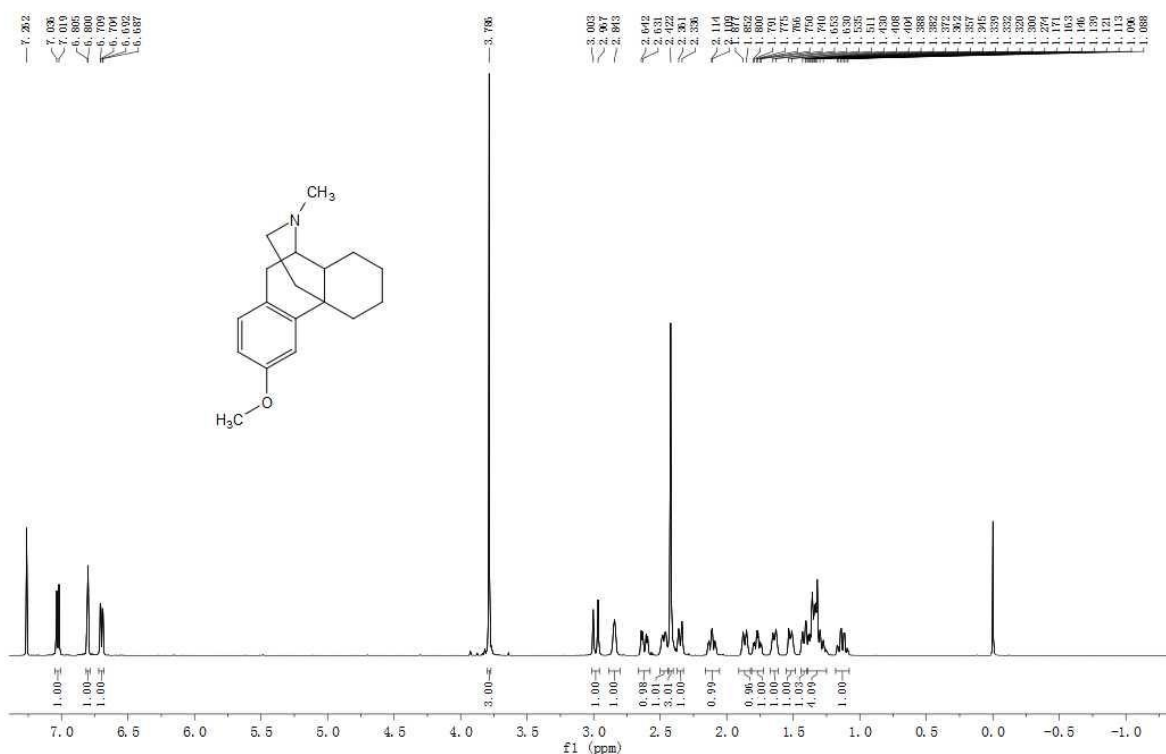



BRUKER AV-III-500 20181222-HM-140531-1 13C-NMR CDCI3

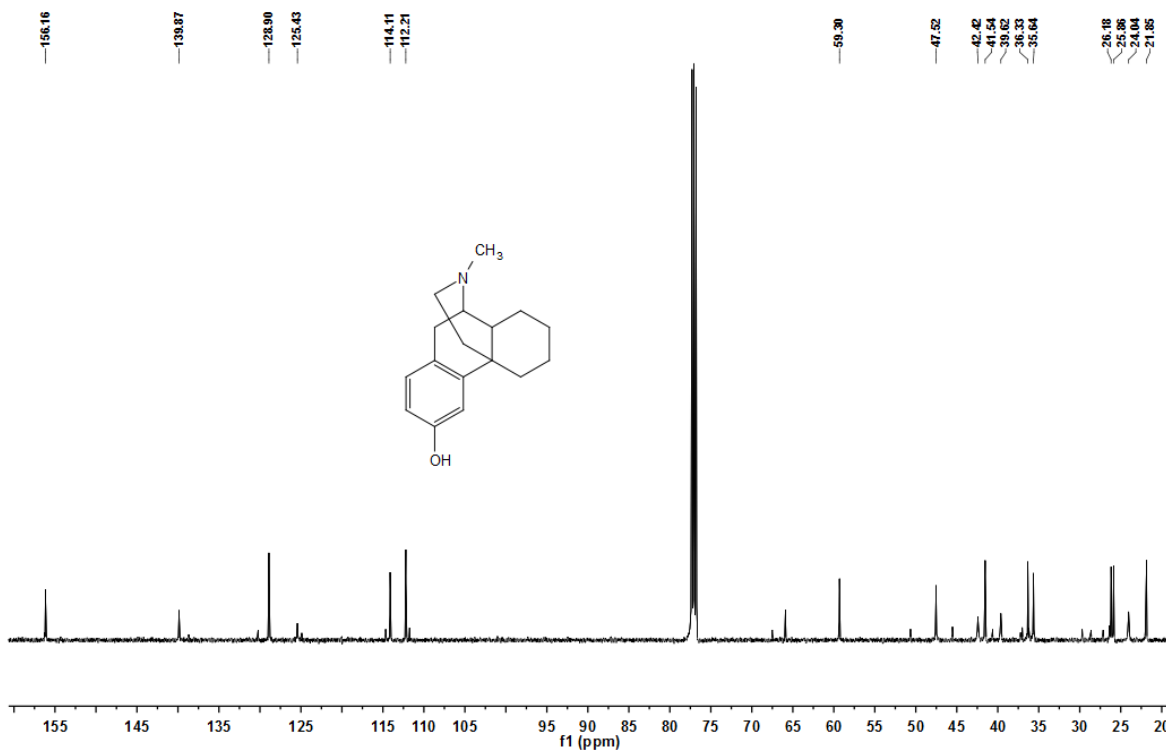

<sup>13</sup>C NMR spectra of compound dextrorphan (2)

HM-140603-3 #256-264 RT: 0.56-0.58 AV: 9 SB: 195 0.32-0.49 , 0.70-0.95 NL: 3.44E6  
T: ITMS + c ESI Full ms [50.00-800.00]

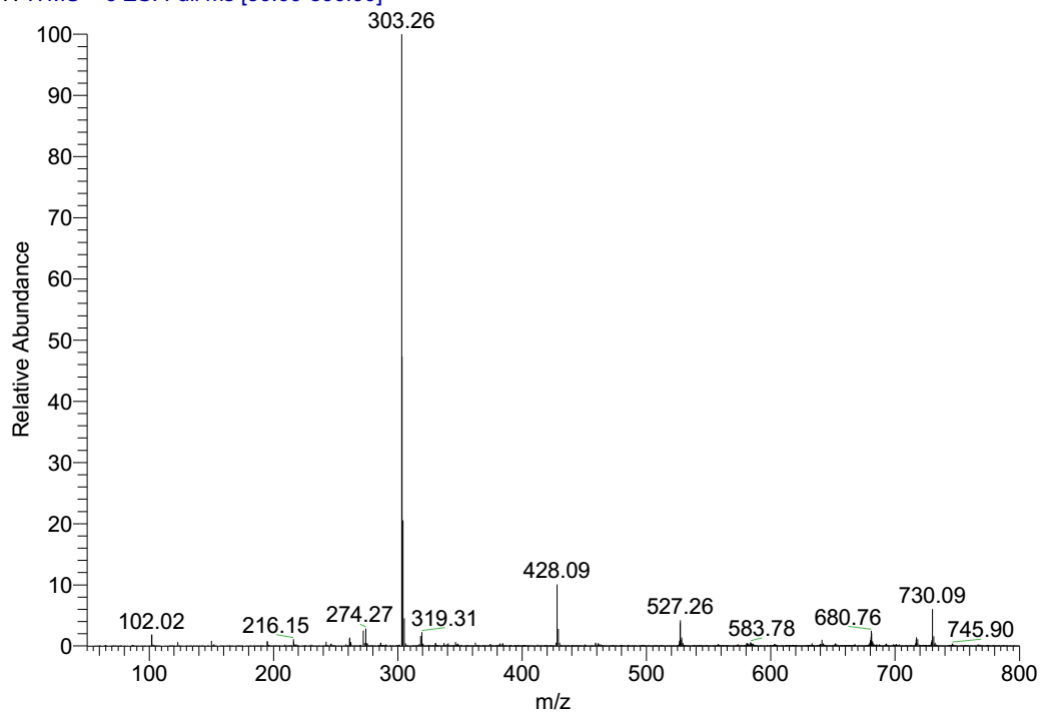

MS spectra of compound 2-nitro-3-hydroxyl-N-methylmorphinan (3)

BRUKER AV-III-500 1H-NMR HM-140603-3 IN CDCL3

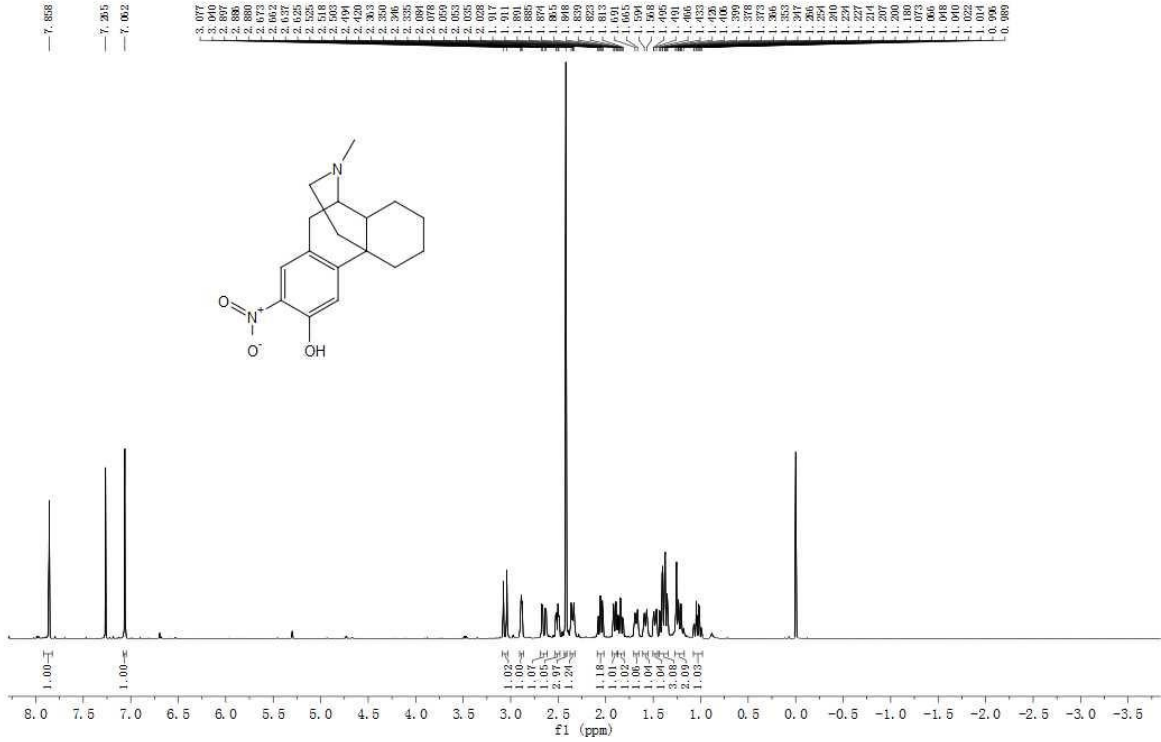

<sup>1</sup>H NMR spectra of compound 2-nitro-3-hydroxyl-N-methylmorphinan (3)

HM-141110-2 -2 #53-62 RT: 0.71-0.80 AV: 10 NL: 4.50E8  
T: FTMS + c ESI Full ms [150.00-1000.00]

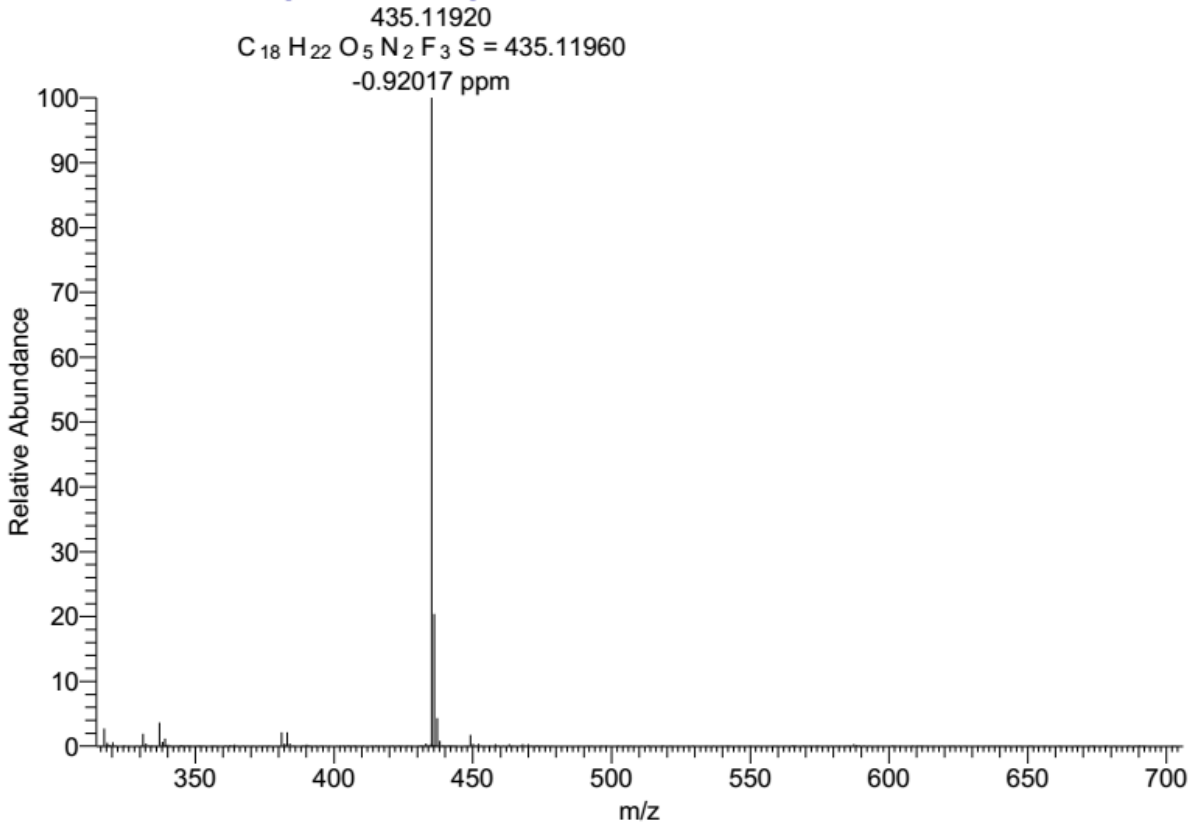

HRMS spectra of compound 2-Nitro-N-methyl-3-trifluoromethanesulfonatmorphinan ester (4)

BRUKER AV-III-500 1H-NMR HM-141110 IN CDCL3

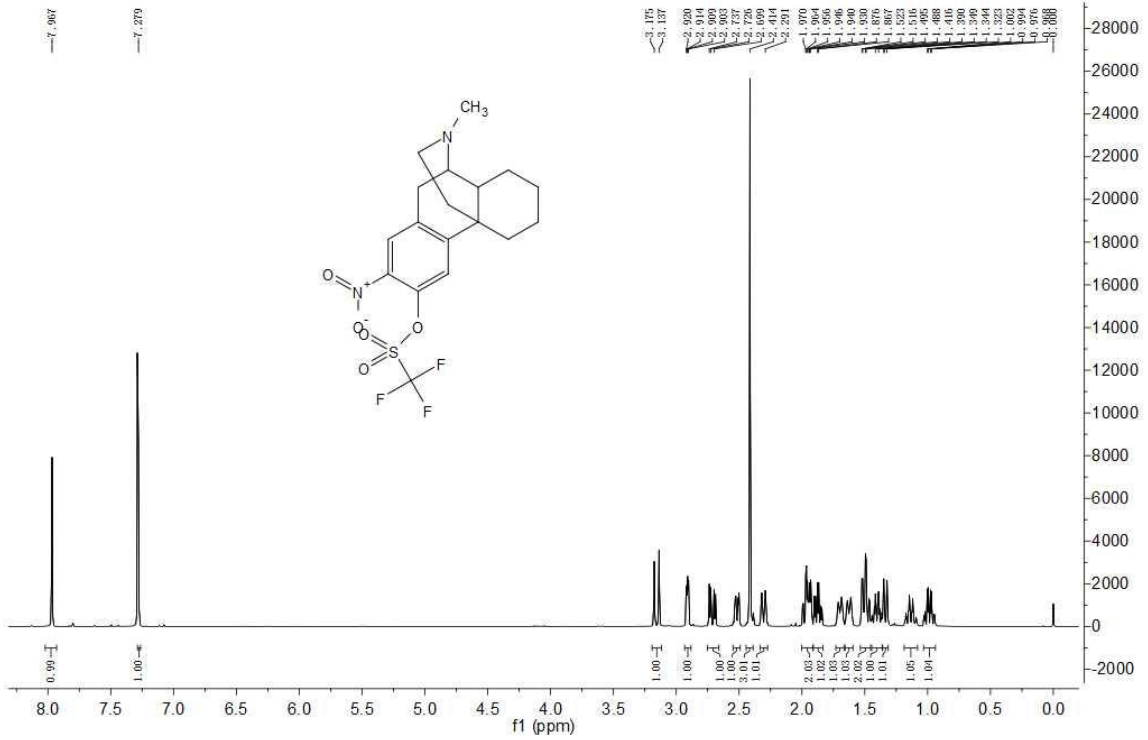

<sup>1</sup>H NMR spectra of compound 2-Nitro-N-methyl-3-(trifluoromethanesulfonyloxy)morphinan ester (4)

HM-141119\_-2 #57-62 RT: 0.83-0.89 AV: 6 NL: 1.80E8  
T: FTMS + c ESI Full ms [150.00-1000.00]

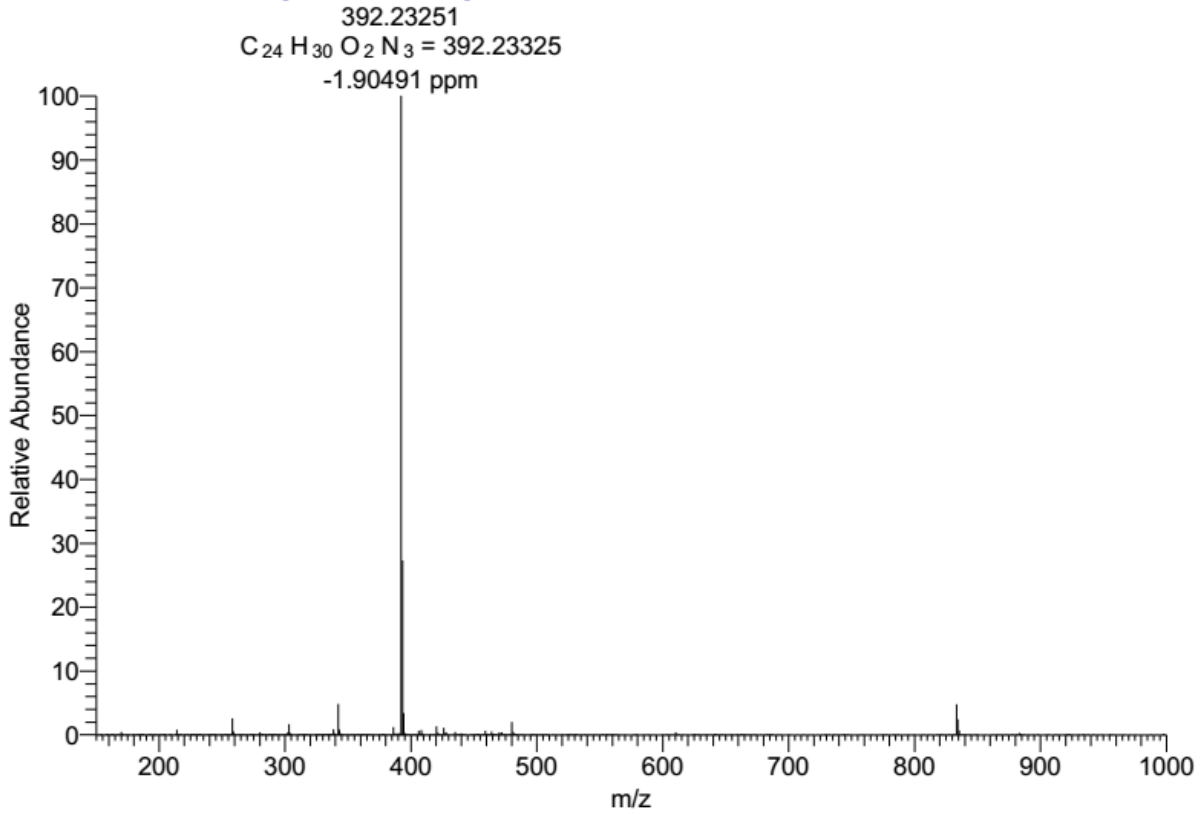

HRMS spectra of compound 2-nitro-3-benzylamino-N-methylmorphinan (5)

BRUKER AV-III-500 1H-NMR HM-141119 IN CDCL3

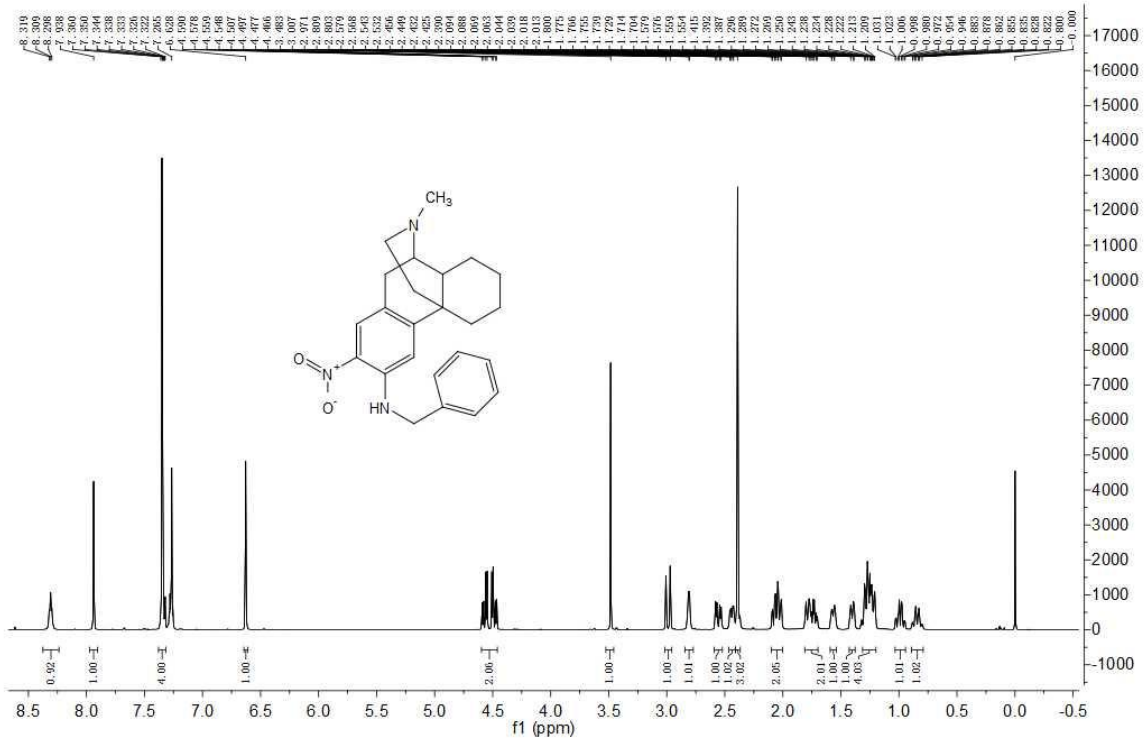

HM-141208\_-2 #217-220 RT: 2.66-2.68 AV: 4 NL: 7.48E7  
T: FTMS + c ESI Full ms [150.00-1000.00]

272.21124  
C<sub>17</sub>H<sub>26</sub>N<sub>3</sub> = 272.21212  
-3.26107 ppm

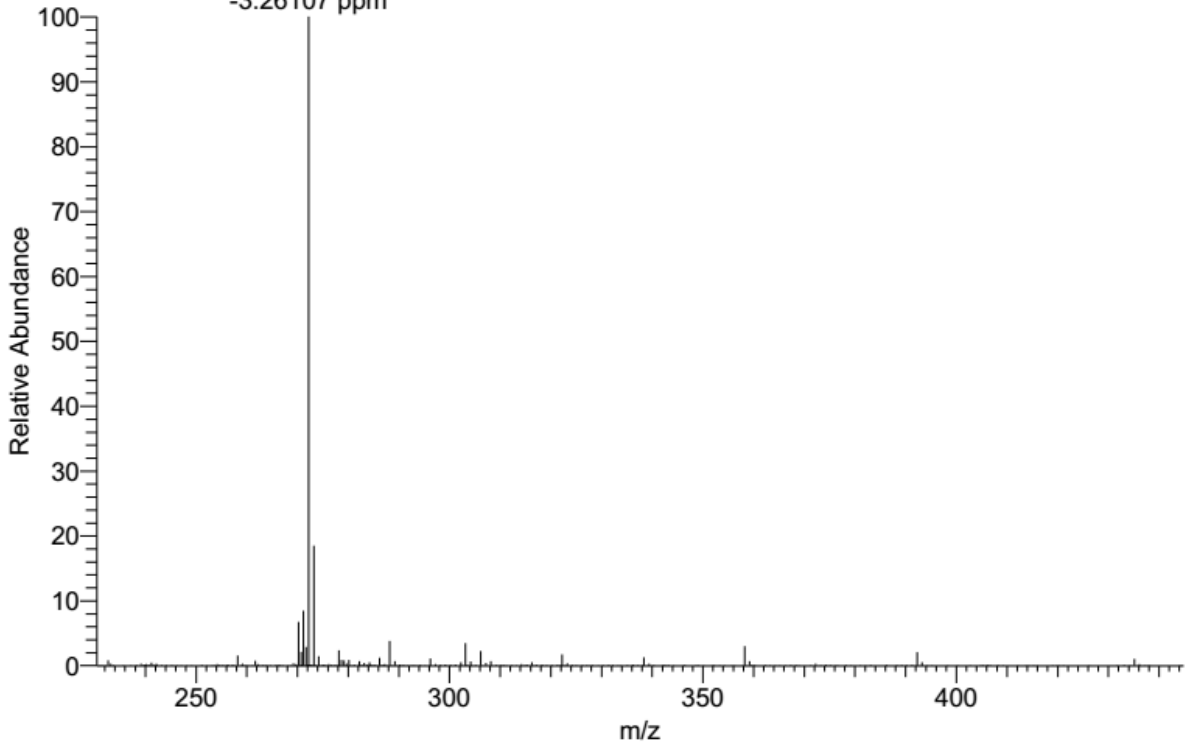

BRUKER AV-III-500 1H-NMR HM-141208 IN CDCL3

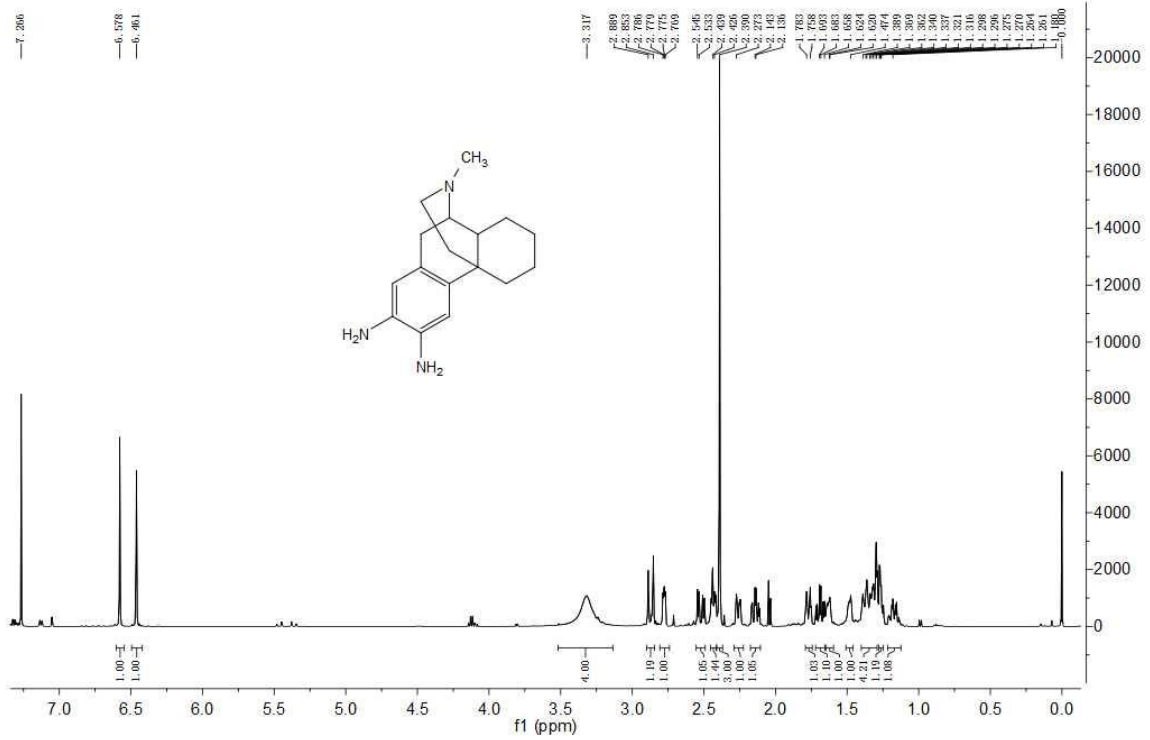

20181226-HM-141208 13C-NMR CDCl3

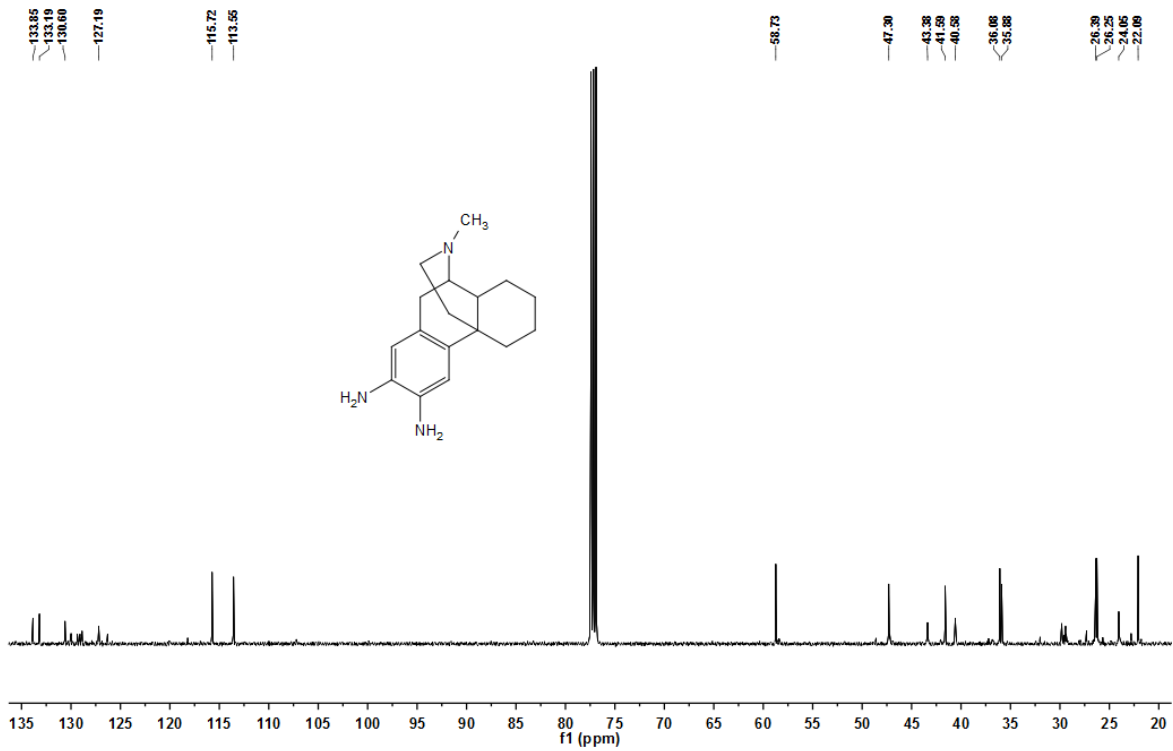



HM-141210 #48-54 RT: 0.56-0.63 AV: 7 SB: 21 0.37-0.48 , 0.73-0.85 NL: 4.44E7  
T: FTMS + c ESI Full ms [292.00-302.00]

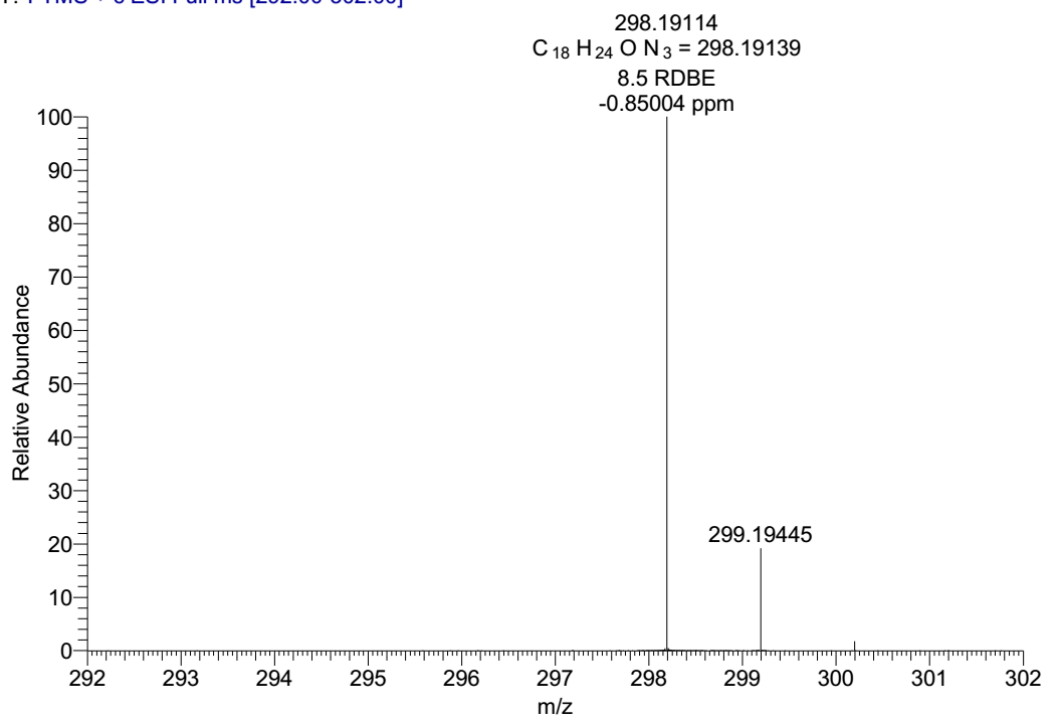

HRMS spectra of compound imidazolone-N-methylmorphinan (7)

BRUKER AV-III-500 1H-NMR HM-141210 IN CDCL3

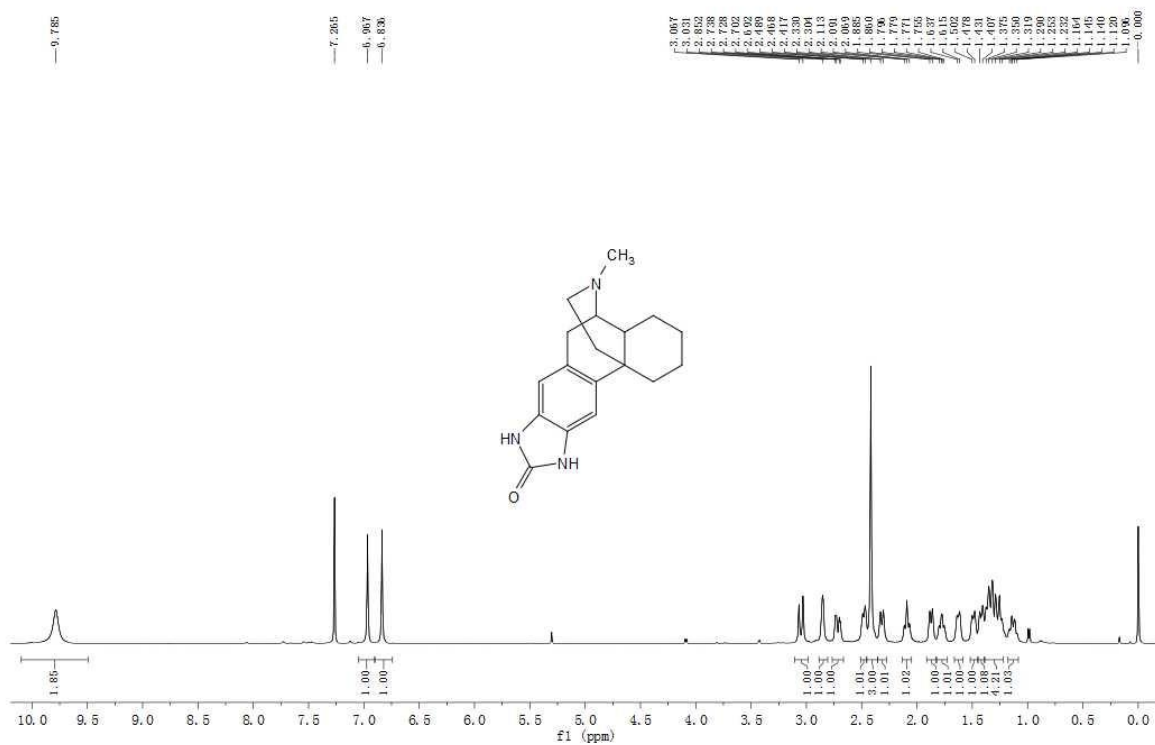

<sup>1</sup>H NMR spectra of compound imidazolone-N-methylmorphinan (7)

BRUKER AV-III-500 13C-NMR HM-141210 IN CDCL3

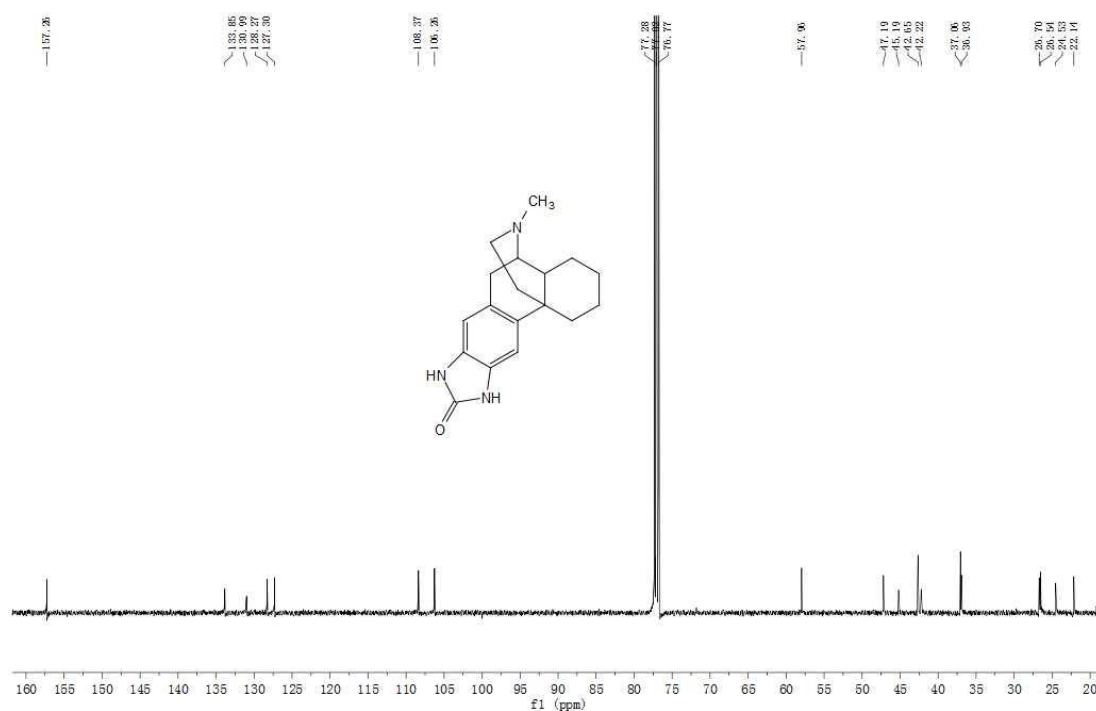

<sup>13</sup>C NMR spectra of compound imidazolone-N-methylmorphinan (7)

HM-150115 #73-77 RT: 0.87-0.92 AV: 5 SB: 30 0.46-0.63, 1.13-1.30 NL: 1.24E7  
T: FTMS + c ESI Full ms [278.00-288.00]

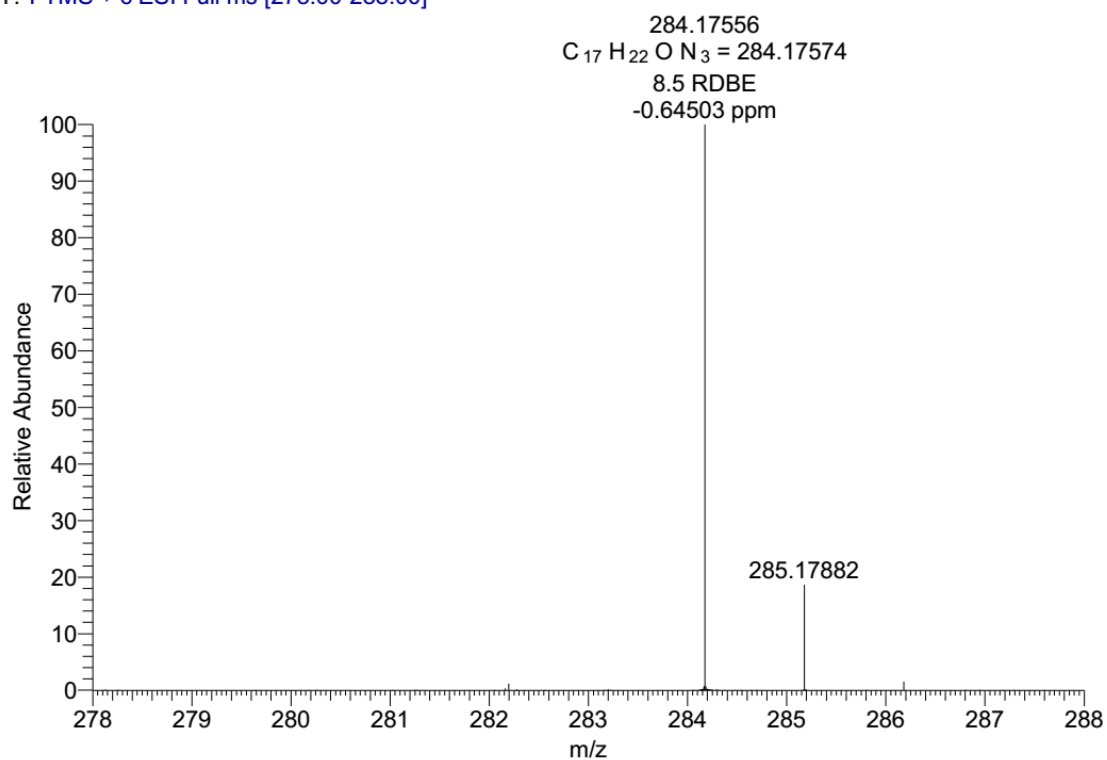

HRMS spectra of compound imidazolone-morphinan (8)
